# Supplementary material
Source: Springer Nature journal article supplement (https://www.springermedizin.de/resource/supplementary/12978_2013_325_MOESM2_ESM.pdf/9602488)

Wife's earnings

Visits to family, friends

Having children

Burmu

Ormanjhi

Burmu

Ormanjhi

Burmu

Ormanjhi

Adjusted Decisionmaking Power Means

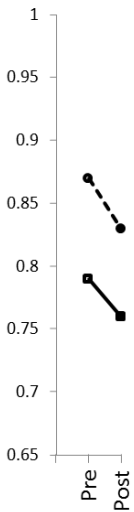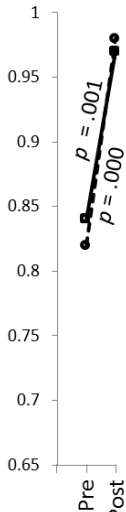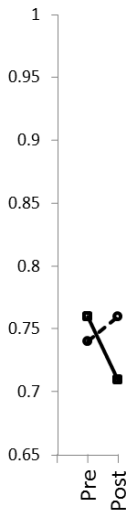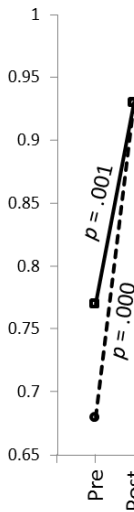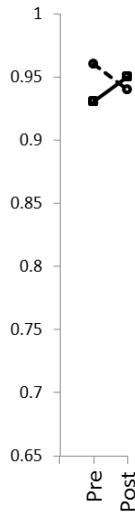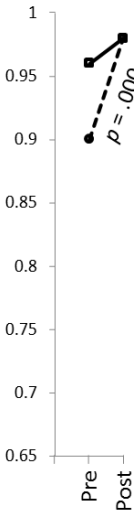

Supplement: MOESM2 [file 9602488]
